# Supplementary material
Source: PubMed Central journal article supplement (PMC2386925)
Supplement: M707540200_1.pdf [file M707540200_1.pdf]

## Online Supplement Figures

Fig. S-1 A. AC isoform transcripts and corresponding molecular weight. B. Average  $1/\Delta\text{CT}$  for each AC isoform in brain, SAN tissue and isolated SANC. \* - difference in the AC expression levels between SAN vs. same transcript in SANC (ND – not determined; \* -  $P < 0.001$ ; \*\* -  $P < 0.005$  (t-test)).

Fig. S-2 A,B. Serially diluted immunodot blots of sucrose gradient fractions of intact SAN tissue for caveolin, GM1 and AC Isoforms. Each fraction was diluted, as indicated, prior to incubation on nitrocellulose, blocked and probed with the indicated antibody as described in methods.

Fig. S-3. CsCl 2 mM completely blocks  $I_f$  current measured in isolated SANC voltage clamped in a whole cell mode configuration by applying a 10 mV step protocol starting at -100 mV and ending at +40 mV for 500 ms from a holding potential of -40 mV.

Table S-1. The list of primers for adenylate cyclases studied by q-RT-PCR in rabbits.

Table S-2. Serial dilutions dot immunoassays of sucrose gradient fractionated sinoatrial node tissue.

A.

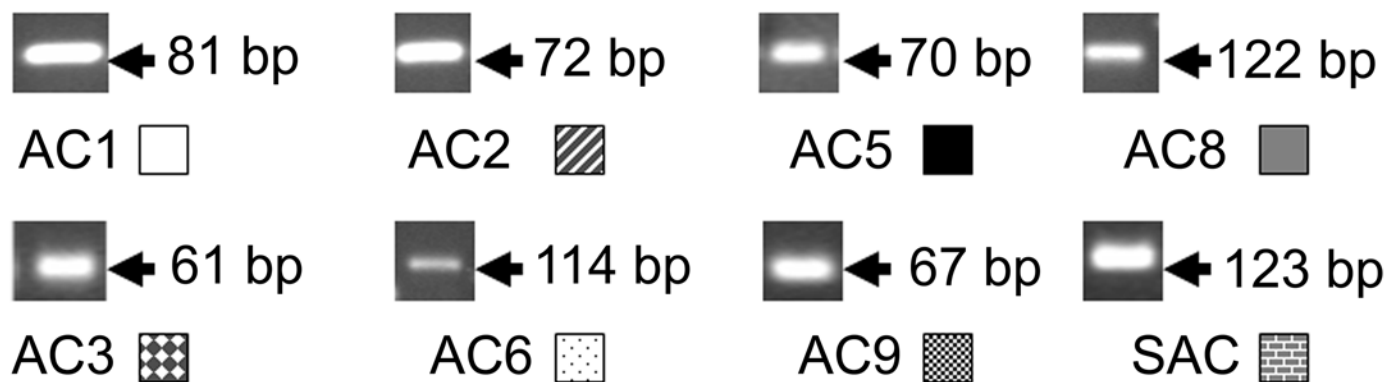

B.

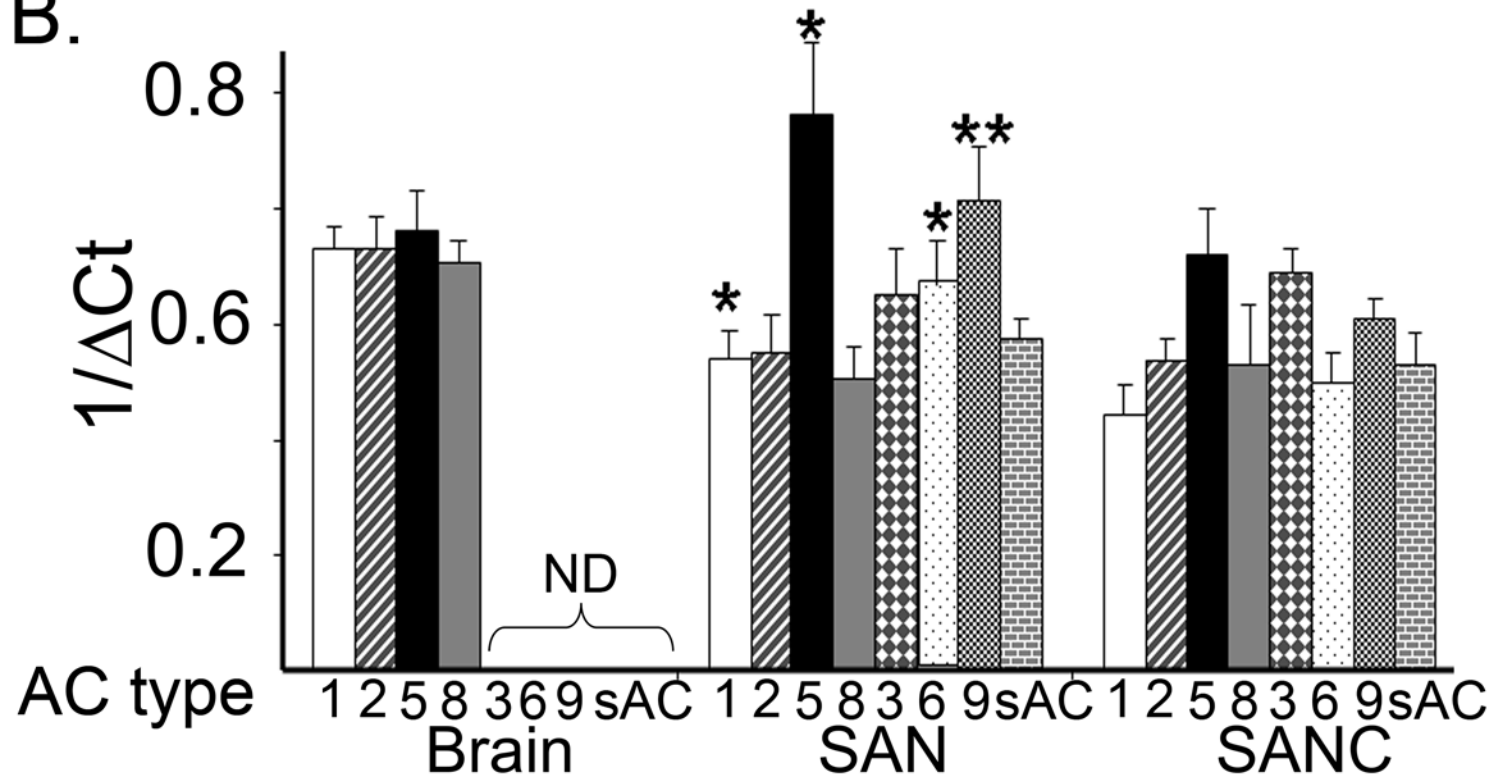

GM1 in SAN Tissue

Dilutions:

1:5

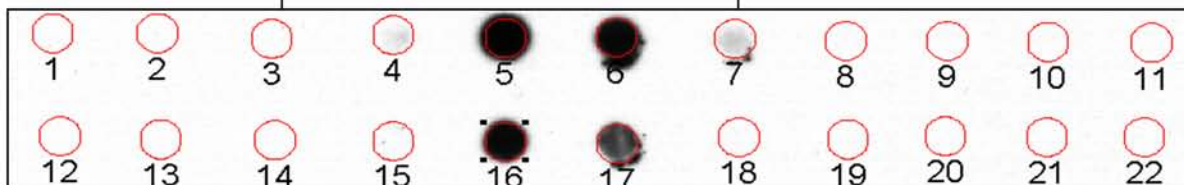

1:10

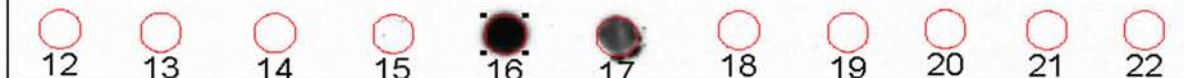

Fractions: 1 2 3 4 5 6 7 8 9 10 11

Cav3 in SAN Tissue

Dilutions:

1:5

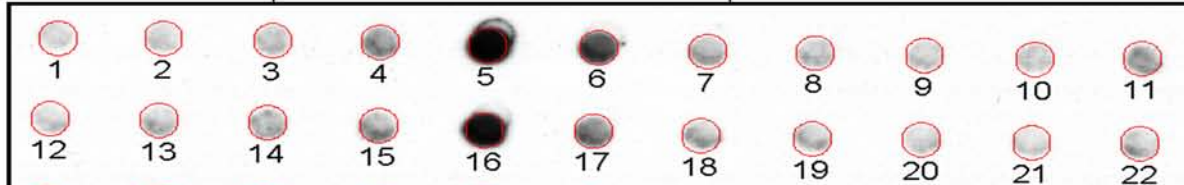

1:10

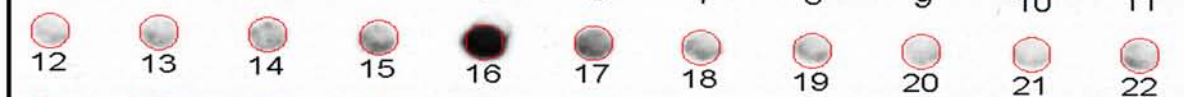

1:20

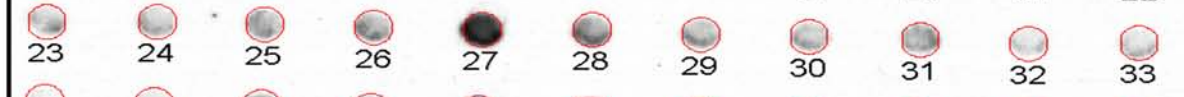

1:40

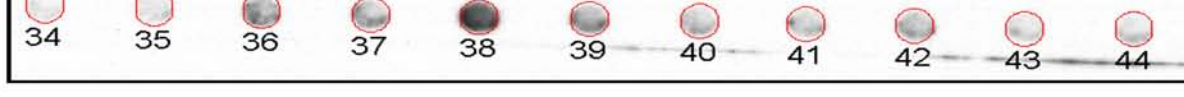

Fractions: 1 2 3 4 5 6 7 8 9 10 11

AC1 in SAN Tissue

Dilutions:

1:5

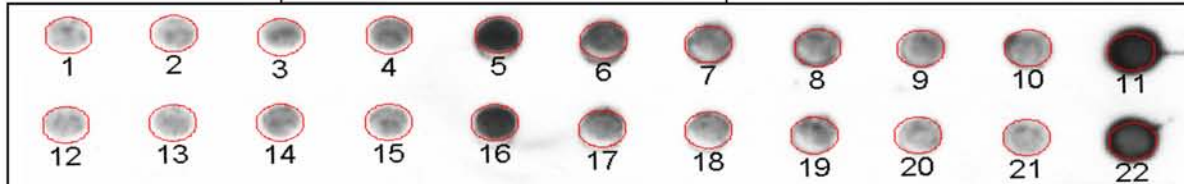

1:10

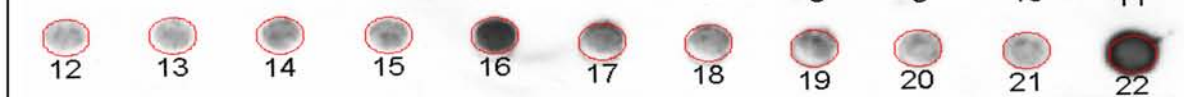

1:20

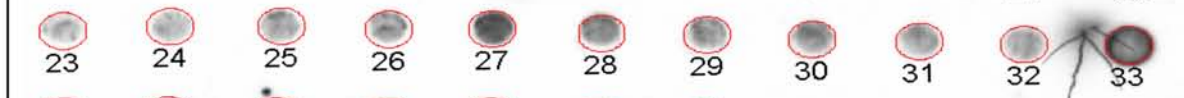

1:40

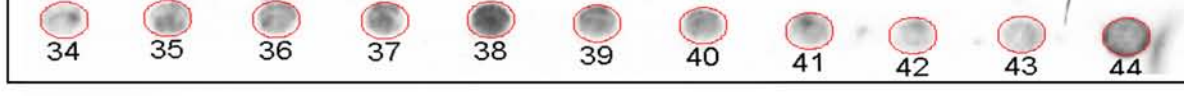

Fractions: 1 2 3 4 5 6 7 8 9 10 11

AC8 in SAN Tissue

Dilutions:

1:5

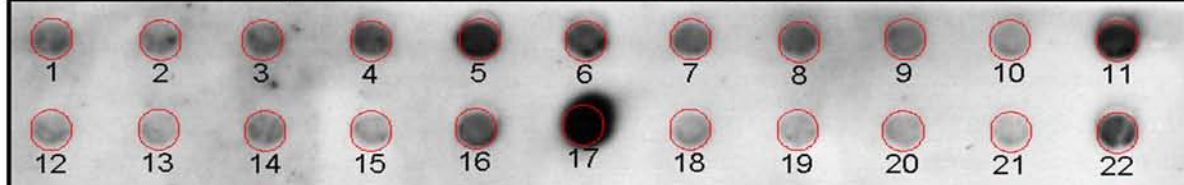

1:10

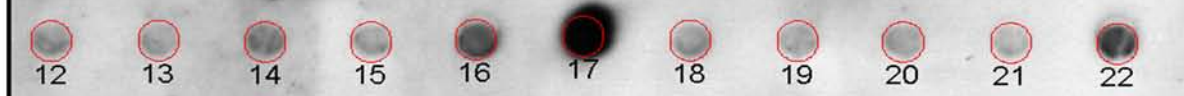

1:20

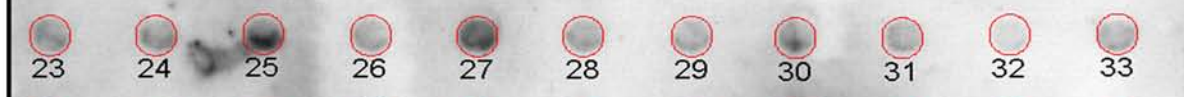

1:40

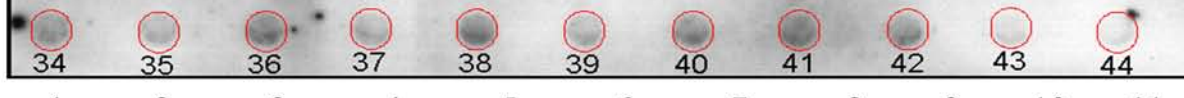

Fractions: 1 2 3 4 5 6 7 8 9 10 11

B.

## AC2 in SAN Tissue

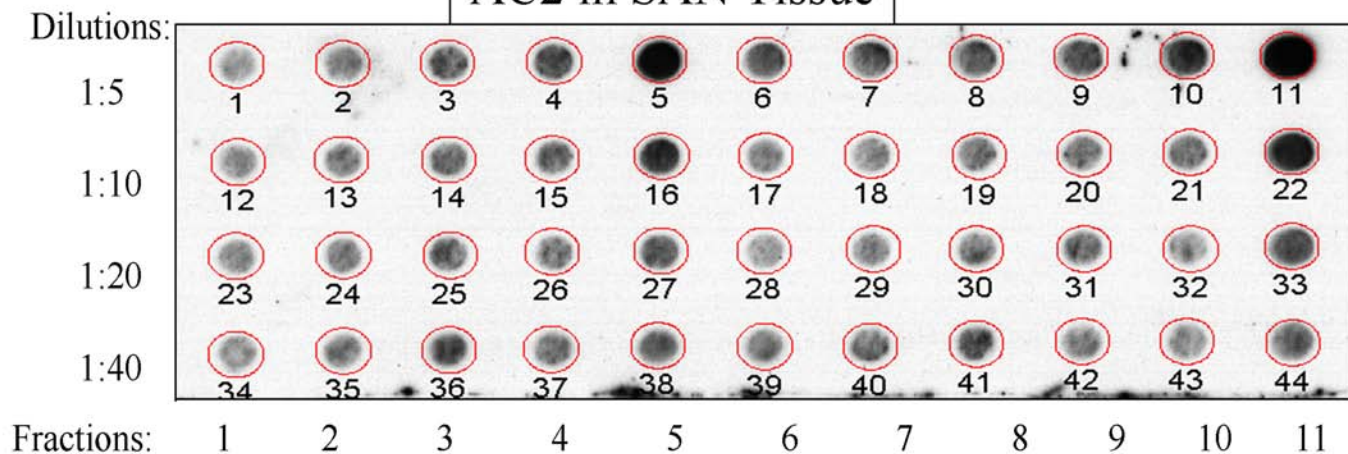

## AC5/6 in SAN Tissue

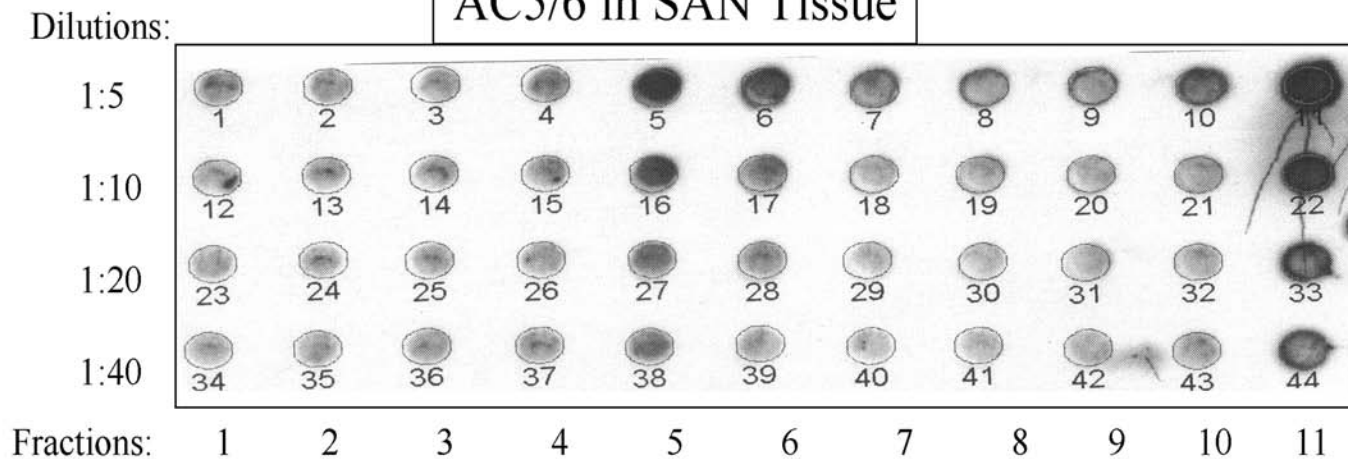

Fig. S-3

Control

CsCl, 2 mM

500 pA

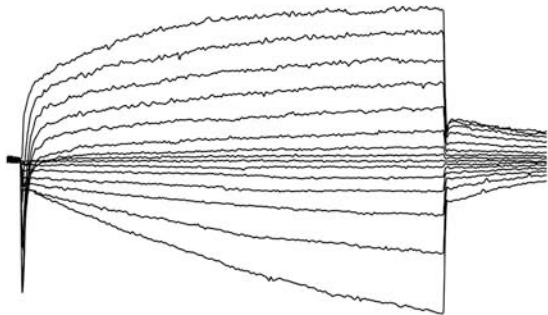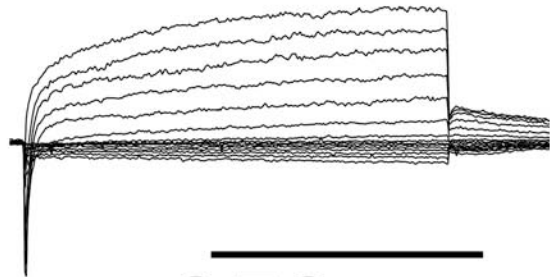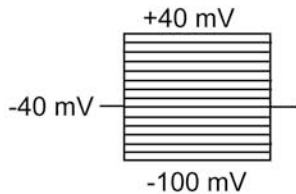

250 ms

**Table S-1. The list of primers for adenylate cyclases studied by q-RT-PCR in rabbits.**

| <b>Genes and accession #</b> | <b>Comments</b>           | <b>Primers</b>                                               | <b>Amplicon size (bp)</b> |
|------------------------------|---------------------------|--------------------------------------------------------------|---------------------------|
| Adcy1                        | Adenylate cyclase 1       | 5'- TGGCAGCTGCTGCTGGTCAC-3'<br>5'-CCACCGCGAGCCCGAAGC-3'      | 84                        |
| Adcy2                        | Adenylate cyclase 2       | 5'- TACAGCCAGGTCCTGTTTCA-3'<br>5'-CCCATGGTCTTCAGGTCTTT -3'   | 72                        |
| Adcy3                        | Adenylate cyclase 3       | 5'-GACCAGCAGCAGTTCAACAC -3'<br>5'-GCAAACAGGATGCTGACATT -3'   | 61                        |
| Adcy4                        | Adenylate cyclase 4       | 5'- ATCAGGAAACTTCGGGTAGC-3'<br>5'-ATATGGTTGGCCAATGTGAC -3'   | 143                       |
| Adcy5 Z29371                 | Adenylate cyclase 5       | 5'-CATGTTTCATGTGCAACTCCA -3'<br>5'- ATGGATCACGCTGATGTTGT-3'  | 70                        |
| Adcy6                        | Adenylate cyclase 6       | 5'- GCTGCGGAGAATCACTGTC -3'<br>5'- TACCCCATCTCCACACAG -3'    | 114                       |
| Adcy8                        | Adenylate cyclase 8       | 5'-TGGCTGCCCTAACAAGAAAT -3'<br>5'-ACTCCGCAAGTCGATGGTAT -3'   | 122                       |
| Adcy9                        | Adenylate cyclase 9       | 5'- GGTCAGAGAGCCAAGGAGTC -3'<br>5'- CAATGACCTCAAAGCCAGAA -3' | 67                        |
| Sac AY212921                 | Soluble adenylate cyclase | 5'- CGGTGGTCATCAAATGTAGC -3'<br>5'- CAAAGACCAGCATGGAGATG -3' | 123                       |
| 18S RNA                      | 18S ribosomal RNA         | 5'- CGCGGTTCTATTTTGTGGTTT -3'<br>5'- GCGCCGGTCCAAGAATTT -3'  | 103                       |

**Table S-2 Serial dilutions dot immunoassays of sucrose gradient fractionated sinoatrial node tissue**

| <b>Markers</b> |             |          |          |          |          |          |          |          |          |          |           |
|----------------|-------------|----------|----------|----------|----------|----------|----------|----------|----------|----------|-----------|
| <b>GM1</b>     | Fraction No |          |          |          |          |          |          |          |          |          |           |
| dilution       | 1           | 2        | 3        | 4        | 5        | 6        | 7        | 8        | 9        | 10       | 11        |
| 1:5            | 1004916     | 1117906  | 1115364  | 4358096  | 76990260 | 73506088 | 10323656 | 1223268  | 1252658  | 1228214  | 1226924   |
| 1:10           | 943118      | 1001734  | 985500   | 1867122  | 72178085 | 52923632 | 1329378  | 1082952  | 1228078  | 1196430  | 1204782   |
| <b>Cav 3</b>   | Fraction No |          |          |          |          |          |          |          |          |          |           |
| dilution       | 1           | 2        | 3        | 4        | 5        | 6        | 7        | 8        | 9        | 10       | 11        |
| 1:5            | 8736576     | 10653762 | 14340976 | 27604197 | 77341748 | 53032558 | 19368172 | 15202408 | 12872722 | 12658780 | 22847345  |
| 1:10           | 10662154    | 14850806 | 19178894 | 23547755 | 73272374 | 33806052 | 18028376 | 15205902 | 11503816 | 10076030 | 15188648  |
| 1:20           | 14463823    | 15282844 | 19840662 | 22047644 | 62041562 | 29405703 | 19041653 | 16229476 | 22050063 | 9090148  | 11484846  |
| 1:40           | 5755300     | 7273886  | 24054097 | 19486050 | 47607195 | 23463425 | 13749712 | 13432195 | 17326430 | 9592856  | 10103988  |
| <b>AC 1</b>    | Fraction No |          |          |          |          |          |          |          |          |          |           |
| dilution       | 1           | 2        | 3        | 4        | 5        | 6        | 7        | 8        | 9        | 10       | 11        |
| 1:5            | 20996593    | 22290170 | 26767785 | 38248444 | 77353396 | 60677976 | 47082152 | 47357079 | 41616003 | 42949452 | 91413992  |
| 1:10           | 20717284    | 20843816 | 28957491 | 28217096 | 69374777 | 41929915 | 34040805 | 37329133 | 28982894 | 29003139 | 82410546  |
| 1:20           | 17105482    | 18760772 | 25299732 | 27183652 | 51998669 | 34851775 | 30456226 | 33833503 | 27663744 | 26595678 | 64508808  |
| 1:40           | 17639393    | 25650062 | 25808352 | 28347966 | 46152364 | 30136105 | 25824728 | 24330530 | 15765460 | 17332682 | 44568947  |
| <b>AC 8</b>    | Fraction No |          |          |          |          |          |          |          |          |          |           |
| dilution       | 1           | 2        | 3        | 4        | 5        | 6        | 7        | 8        | 9        | 10       | 11        |
| 1:5            | 54683752    | 49569445 | 56994635 | 63815253 | 81613201 | 68824218 | 54876245 | 60256779 | 54360263 | 39067029 | 80712164  |
| 1:10           | 38600053    | 33693770 | 46446296 | 31541488 | 62259069 | 97166772 | 35064888 | 29198174 | 31219296 | 24404798 | 58271295  |
| 1:20           | 36150846    | 34411446 | 54693733 | 27585790 | 52884549 | 27185970 | 25905202 | 35444498 | 25875098 | 13048604 | 23035940  |
| 1:40           | 36358020    | 23938200 | 42057381 | 25861290 | 38834211 | 24095440 | 36994859 | 44962392 | 33300664 | 12291896 | 9729742   |
| <b>AC 2</b>    | Fraction No |          |          |          |          |          |          |          |          |          |           |
| dilution       | 1           | 2        | 3        | 4        | 5        | 6        | 7        | 8        | 9        | 10       | 11        |
| 1:5            | 7045082     | 10848698 | 14992051 | 18016947 | 42858015 | 18776863 | 18171290 | 17196569 | 18495989 | 26101008 | 50641657  |
| 1:10           | 8251942     | 10193342 | 12227502 | 12242160 | 24824218 | 9750784  | 8750766  | 10837160 | 10902922 | 12434134 | 32568652  |
| 1:20           | 9211106     | 10397672 | 13087936 | 10497630 | 15847356 | 7452174  | 9038890  | 10646170 | 11749471 | 8797580  | 19933384  |
| 1:40           | 8967706     | 10690906 | 16148290 | 11574736 | 14406354 | 11367578 | 12144758 | 14946819 | 10377620 | 8964632  | 15066322  |
| <b>AC 5/6</b>  | Fraction No |          |          |          |          |          |          |          |          |          |           |
| dilution       | 1           | 2        | 3        | 4        | 5        | 6        | 7        | 8        | 9        | 10       | 11        |
| 1:5            | 50334686    | 42077399 | 37285423 | 50480797 | 91981838 | 84418127 | 65557102 | 57537137 | 61625809 | 80416618 | 102172020 |
| 1:10           | 43840684    | 37238499 | 38299625 | 43616024 | 77859218 | 63512921 | 37773042 | 41815195 | 40363587 | 49684673 | 98424306  |
| 1:20           | 36079159    | 33422524 | 35703738 | 39035975 | 60620224 | 51592907 | 27987083 | 28269519 | 34326649 | 40108650 | 86000150  |
| 1:40           | 33082006    | 37331354 | 41935292 | 45324297 | 58025951 | 38249241 | 28146818 | 29177626 | 38841094 | 45429343 | 79688770  |
